1 **Title:** Heat dissipation capacity influences reproductive performance in an aerial

2 insectivore

3

4 Simon Tapper\*<sup>1</sup>, Joseph J. Nocera<sup>2</sup>, Gary Burness<sup>1</sup>

5

6 <sup>1</sup>Environmental and Life Sciences Graduate Program, 1600 West Bank Dr., Peterborough

7 ON, Canada

8 <sup>2</sup>University of New Brunswick, Forestry and Environmental Management, Fredericton

9 NB, Canada

10 <sup>1</sup>Department of Biology, Trent University, 1600 West Bank Dr., Peterborough ON,

11 Canada

12 \* Correspondence Author: [simontapper@trentu.ca](mailto:simontapper@trentu.ca)

13

#### 14 **Author contribution statements**

15 ST, JN, and GB designed the research. ST performed all field sampling, analysed the data

16 and wrote the manuscript; ST, JN and GB edited the manuscript and approved the final

17 draft. The authors declare no conflict of interest.

18

19

20

21

22

23

## 24 **Abstract**

25 Climatic warming will likely increase the frequency of extreme weather events, which  
26 may reduce an individual's capacity for sustained activity due to thermal limits. We  
27 tested whether the risk of overheating may limit parental provisioning of an aerial  
28 insectivorous bird in population decline. For many seasonally breeding birds, parents are  
29 thought to operate close to an energetic ceiling during the 2-3 week chick-rearing period.  
30 The factors determining the ceiling remain unknown, although it may be set by an  
31 individual's capacity to dissipate body heat (the heat dissipation limitation hypothesis).  
32 To test this hypothesis, over two breeding seasons we experimentally trimmed the ventral  
33 feathers of female tree swallows (*Tachycineta bicolor*) to provide a thermal window. We  
34 then monitored maternal provisioning rates, nestling growth rates, and fledging success.  
35 We found the effect of our experimental treatment was context-dependent and varied  
36 with environmental conditions. Females with trimmed plumage fed their nestlings at  
37 higher rates than controls when conditions were hot and non-windy, but the reverse was  
38 true under cool and windy conditions. On average, nestlings of trimmed females were  
39 heavier than controls, and had a higher probability of fledging. We suggest that removal  
40 of a thermal constraint allowed females to increase provisioning rates, but additionally  
41 provided nestlings with a thermal advantage via increased heat transfer during maternal  
42 brooding. Our data provide partial support for the heat dissipation limitation hypothesis,  
43 and suggest that depending on weather patterns, heat dissipation capacity can influence  
44 reproductive success in aerial insectivores.

## 45 **Keywords**

46 Energy expenditure, thermal constraint, parental care, climate, activity

## 47 **Introduction**

48 With rising global temperatures, animals will experience warmer than average annual  
49 temperatures, and increased frequency of heat waves and droughts (IPCC 2014). Under  
50 such changing conditions, animals must maintain stable body temperatures ( $T_b$ ) in the  
51 face of heat stress (McKechnie and Wolf 2009). A rise in  $T_b$  above steady state levels  
52 (i.e., hyperthermia) occurs when heat is generated and/or acquired from the environment  
53 faster than it can be dissipated (Speakman and Król 2010). Non-fatal hyperthermia can  
54 have several deleterious physiological consequences, including disrupted cellular  
55 signalling (Boulant 1998); impaired synthesis and damage of proteins (Roti Roti 2008);  
56 elevated levels of oxidative stress (Costantini et al. 2012); depressed innate and adaptive  
57 immune function (Palermo-Neto et al. 2013); and impaired growth and development  
58 (Baumgard and Rhoads 2013), among others.

59         Given the suite of physiological consequences that can develop from  
60 hyperthermia, the capacity to dissipate body heat has recently been proposed as a key  
61 factor shaping the behaviour, physiology, and ecology of endotherms (“Heat Dissipation  
62 Limitation” (HDL) hypothesis (Speakman and Król 2010). Specifically, the HDL  
63 hypothesis posits that in endothermic animals maximally sustained energy expenditure is  
64 limited by an individual’s maximal capacity to dissipate body heat. Understanding the  
65 limits to sustained energy expenditure, or sustained metabolic rate (SusMR), is important  
66 because metabolic ceilings could impose constraints on life-history traits (Drent and Daan  
67 2002; Peterson et al. 1990). For example, an energetic ceiling in chick-rearing birds could  
68 theoretically influence clutch size because parent birds can only feed a certain number of

69 chicks based on their sustained level of energy expenditure (Peterson et al., 1990;  
70 Monaghan and Nager, 1997).

71         There are several lines of indirect evidence, which support the HDL hypothesis.  
72 For instance, activity levels decline with high ambient temperature ( $T_a$ ) (Carroll et al.  
73 2015; Theuerkauf et al. 2003; Zub et al. 2013); animals preferentially select habitats  
74 within their home range to escape solar radiation at the expense of resource acquisition  
75 (Lease et al. 2014; Street et al. 2015; van Beest et al. 2012); in birds, individuals with  
76 bigger bills (larger “thermal windows”) are more active and spend more time singing on  
77 hot days than do birds with smaller bills (Luther and Danner 2016).

78         While there exists indirect evidence from studies across different taxa, direct tests  
79 of the HDL hypothesis have primarily been performed on lactating laboratory rodents.  
80 For example, when lactating animals are experimentally exposed to cooler temperatures,  
81 they can increase energy intake and milk production beyond levels seen at warmer  
82 ambient temperatures (Hammond et al. 1994; Johnson and Speakman 2001; Ohrnberger  
83 et al. 2016). Furthermore, when the fur of lactating rodents is shaved, they consume more  
84 food and produce more milk compared with non-shaved controls (Gamo et al. 2016; Król  
85 et al. 2007), suggesting that capacity to dissipate heat place limits on performance.

86         Despite this direct evidence of an HDL for laboratory mammals, there have been  
87 few experimental studies testing the HDL hypothesis in free-ranging animals (Valencak  
88 et al., 2011;). Two recent studies on breeding tits, however, provided some experimental  
89 evidence for the HDL hypothesis in free-ranging birds (Nilsson and Nord 2018; Nord and  
90 Nilsson 2018). Nord and Nilsson (2018) removed the ventral plumage from breeding blue  
91 tits, *Cyanistes caeruleus*, and found that feather-clipped parents had heavier nestlings

92 than controls, while maintaining lower body temperatures and without additional mass  
93 loss. However, there were no differences in feeding rates between the treatments, and  
94 only older parents had heavier nestlings. This result suggests that the limit to SusMR  
95 might be influenced by life-history strategy, which could also explain why some species  
96 (e.g., European Hare, *Lepus europaeus*, Pallus) do not exhibit an HDL (Valencak et al.  
97 2011).

98 One aspect largely ignored by previous studies examining the limits to SusMR is  
99 the influence of other environmental factors on heat balance. For instance, wind carries  
100 heat away from the body via convection, and increasing wind speeds decrease heat gain  
101 from solar radiation (Wolf and Walsberg 1996). Further, rates of evaporative water loss  
102 can be severely inhibited by high humidity, and thus variation in humidity could alter  
103 activity levels (Gerson et al. 2014). Finally, in addition to the temperature, wind speed,  
104 relative humidity, and precipitation have been shown to play an important role in  
105 influencing foraging activity in aerial insectivores (Cox et al. 2019; Ouyang et al. 2015;  
106 Rose 2009). Therefore, testing the HDL hypothesis in free-ranging animals should  
107 attempt to control for these additional factors.

108 To determine whether heat dissipation constrains reproductive performance in  
109 breeding birds, we experimentally manipulated the ability of female tree swallows  
110 (*Tachycineta bicolor*) to dissipate body heat, by removing feather overlying the brood  
111 patch. Tree swallows are an excellent model species in which to test the HDL hypothesis.  
112 As aerial insectivores, they are active foragers, and can spend up to 16 hours per day  
113 gathering insects to feed their nestlings. We predicted that, if in general (i.e., across  
114 environmental conditions), the ability to dissipate body heat limits SusMR then (1)

115 trimmed birds would maintain higher feeding rates than control birds (2) trimmed birds  
116 would have heavier offspring and (3) offspring of trimmed birds would have greater  
117 fledging success than those of non-trimmed birds. Given that temperature does not occur  
118 in isolation of other environmental factors, these predictions maybe context-dependent.

119

## 120 **Materials and methods**

### 121 **Study area and species**

122 All research was approved by the Trent University Animal Care Committee, in  
123 accordance with the Canadian Council on Animal Care (AUP # 24747). We conducted  
124 this study in May-July 2017 and 2018, on two nest-box breeding populations of tree  
125 swallows located at the Trent University Nature Areas, Peterborough, Ontario, Canada  
126 (44°21'N, 78°17'W) and at the Lakefield Sewage Lagoon, Lakefield, Ontario  
127 (44°24'58.3"N 78°15'26.8"W). The Trent Nature Areas consists of relatively open grassy  
128 fields, and there are about 70 boxes spaced ~10-20m apart. The Lakefield Sewage  
129 Lagoon consist of two rectangular lagoons, with 50 boxes encircling the perimeter, and  
130 spaced 10-20m apart. Females at both sites typically lay clutches of five to seven eggs,  
131 with one egg laid each day. Once a clutch is completed, females incubate the nest for  
132 approximately 14 days, and nestlings typically hatch synchronously. Nestlings typically  
133 fledge 18-22 days post-hatch.

134

### 135 **General field methods**

136 Beginning in May each year, we checked nest boxes every other day until the presence of  
137 nest material was discovered, at which point boxes were monitored every day until clutch

138 completion. We used a marker pen to sequentially number eggs as they were laid; the  
139 date the last egg was laid was considered to be day 0 of incubation. Hatch date (day 0) for  
140 the brood was considered the first day when nestlings hatched.

141

## 142 **Experimental manipulation**

143 We captured females during early nestling provisioning (see capture protocol below), and  
144 upon capture, randomly assigned females to either a trimmed or control condition, based  
145 on a flip of the coin. In the trimmed condition, we removed the contour and downy  
146 feathers covering the brood patch (details below) to expose the bare skin underneath  
147 (Figure S1). We chose to remove feathers from this region because 1) it is highly  
148 vascularized, increasing the chance of heat loss and 2) there would be minimal  
149 interference with flight.

150 We performed trimming manipulations with two people: one person held the bird  
151 ventral side up, while the other person, using surgical scissors, cut the feathers away.  
152 Control females were handled identically, but instead of cutting the feathers, we  
153 performed a “mock cut”, in which we cut the air above the brood patch. In 2018, we  
154 additionally measured the size of the exposed area for all trimmed females ( $n = 21$ ). We  
155 quantified both the length and width of the exposed skin using a piece of string. The  
156 median ( $\pm$  median absolute deviation, MAD) length of exposed skin was  $3.1 \pm 0.2$ cm  
157 (range: 2.6-3.7cm) and the median width of exposed skin ( $\pm$  MAD) was  $1.9 \pm 0.1$ cm  
158 (range: and 1.5-2.1cm). Assuming the trimmed area was an ellipse, the amount of  
159 exposed skin would be  $4.63\text{cm}^2$ . The estimated percentage of total surface area trimmed  
160 was  $\sim 7\%$  (see supplementary material for details).

161 **Remote monitoring of activity**

162 As an index of activity, we quantified provisioning rate of females using passive  
163 integrative transponder (PIT) tags. During late incubation (day 7 – day 10 post-clutch  
164 completion), we captured females in their nest box and implanted them in the nape of the  
165 neck with either 1) non-temperature sensitive (EM4100; #11001, GAO RFID, Ontario,  
166 Canada) or 2) temperature-sensitive (Biotherm13; Biomark, Boise, Idaho, USA) PIT tags,  
167 following Nicolaus et al. (2011). Data on body temperature from the Biotherm13 tags are  
168 part of a parallel study. Following implantation, we recorded body mass, wing chord  
169 (flattened), head-bill length, exposed culmen (*sensu* Borrás et al., 2014), and determined  
170 age (second year or after second year) based on plumage coloration (Hussell 1983). Total  
171 time in the hand was approximately 12 minutes. Details regarding the reader set-up are  
172 described in the supplementary materials.

173 On day 1 post-hatch, we captured females again and performed the experimental  
174 manipulation (control vs. trimmed), recorded body mass, and obtained a 50-75  $\mu$ L blood  
175 sample from the brachial vein as part of a parallel study. At day 10 of provisioning, we  
176 again measured body mass and collected a second blood sample.

177 We had six females with data from both years. We attempted to give each bird the  
178 opposite treatment that it received in 2017, but in an effort to keep the sample sizes  
179 within the treatments approximately balanced, four individuals received the opposite  
180 treatment and two received the same treatment.

181

182

183



184 **Nestling measurements**

185 Nestlings were measured between ~1200 – 1800h. To determine the effect of maternal  
186 treatment on nestling growth rate, we weighed nestlings at days 0 (hatch), 3, 6, 9 and 12  
187 (i.e., peak body mass). We did not handle nestlings beyond day 12 to prevent premature  
188 fledging. In 2017, we weighed nestlings on a spring and digital scale and in 2018 on a  
189 digital scale only. This did not affect our conclusions, but see supplementary material for  
190 details. As an index of nestling body size, we measured wing chord on day 12 using a  
191 wing-rule (with a stop). As part of another study, we collected a blood sample (~75  $\mu$ L)  
192 from each nestling at day 12. Fledging success was determined after checking all nest  
193 boxes on day 18 post-hatch, and in the following days as necessary. There were no  
194 instances of premature fledging from checking the nest box.

195

196 **Data compilation and organization**

197 *Feeding rate*

198 Most adult females were caught when nestlings were 1-2 days of age (see *female*  
199 *captures* above), and we therefore only included feeding rate data between nestling ages  
200 3 to 14d, and between the hours of 0500 and 2100. We only included data collected  
201 within 0500 and 2100h because swallows are relatively inactive during this window  
202 (S.Tapper, unpublished data). Our feeding rate data range from 01-Jun-2017 to 29-Jun-  
203 2017 and from 31-May-2018 to 11-Jul-2018.

204 For data organization and statistical analyses, we used R (version 3.5.1, R Core  
205 Team). To transform raw RFID reads into visits to the nest box, we used the function  
206 “visits” from the package *feedr* (LaZerte et al. 2017). We considered repeated reads from

207 the same individual as a singular event if successive reads were < 60s apart. We defined  
208 daily feeding rate as the total number of visits per day / the total number of hours in  
209 which the bird was logged on the reader (i.e., an integer). We included each hour toward  
210 the total number of hours spent provisioning if there was at least one read in the hour of  
211 interest. We chose this definition over a typical standardized provisioning rate (e.g.,  
212 number of visits/16hrs (0500-2100h) because of unequal number of observations across  
213 birds. Unequal observations were due to 1) birds with thermal tags having fewer overall  
214 hours of data (due to cycling of readers among boxes) and 2) because some birds had  
215 missing data as a result of equipment failure. This definition provides a relatively  
216 unbiased measure of feeding rate compared with one in which the total number of hours  
217 across all birds was assumed to be the same (i.e., standardized).

218

### 219 *Environmental variables*

220 We gathered data on daily mean ambient temperature (°C), wind speed (km·hr<sup>-1</sup>), relative  
221 humidity (%), and total precipitation (mm), from Trent University's weather station,  
222 which is located approximately 1.5km from the Trent University Nature Areas and 9.5km  
223 from the Sewage Lagoon and (downloadable from Environment Canada,  
224 [http://climate.weather.gc.ca/index\\_e.html](http://climate.weather.gc.ca/index_e.html)). We calculated averages over 24h, because  
225 overnight and early morning weather could have carry-over effects on feeding behaviour  
226 the next day. To avoid multiple univariate statistical tests we collapsed our four weather  
227 variables using principle component analysis (PCA). We centered and scaled the data  
228 prior to calculation of the correlation matrix. The first two PCs explained a combined  
229 total of 69.1% (PC1 = 41.54%, PC2 = 27.58%) of the variation in weather. PC1 was

230 loaded primarily by relative humidity and total precipitation (Table 1), while PC2 was  
231 predominately loaded by wind speed and temperature (Table 1). We included both PC1  
232 and PC2 scores in our statistical models because we were interested in how the different  
233 weather variables related to treatment independently of each other (i.e., humidity and  
234 precipitation vs. wind speed and temperature),

235

## 236 **Statistical analyses**

237 For all analyses (i.e., feeding rate, nestling body mass, fledging success), we only  
238 included nests that fledged at least one nestling. Unless otherwise stated, model  
239 parameters were estimated by restricted maximum likelihood, degrees of freedom and *p*-  
240 values were calculated using the Satterthwaite approximation in the lmerTest package  
241 (version 3.1-0, Kuznetsova et al., 2017), and confidence intervals were calculated with  
242 the Wald method in the lme4 package (version 1.1-20, Bates et al., 2015). Means reported  
243 are estimated marginal means, generated using the emmeans package (version 1.3.2,  
244 Lenth, 2019). We considered *P*-values  $\leq 0.05$  as statistically significant. We checked that  
245 our models met assumptions of normality and homogeneity of variance by visual  
246 inspection of the residuals.

247

## 248 **Feeding rate**

249 We tested for an effect of experimental treatment (trimmed or control) on maternal  
250 feeding rate (expressed as visits·hr<sup>-1</sup>) using linear mixed effects models (lme4). In 2017,  
251 there were a total of 18 females included in the analysis (Control<sub>2017</sub> = 10, Trimmed<sub>2017</sub> =  
252 8), while in 2018 there were a total of 37 females (Control<sub>2018</sub> = 18, Trimmed<sub>2018</sub> = 19).

253 We included brood size, treatment, PC1 score, PC2 score, year, lay date, and chick age as  
254 main effects in our model, and interactions terms for: (1) treatment x PC1, and (2)  
255 treatment x PC2. In each year, we standardized lay date so that the first day in which a  
256 female laid an egg was given the value of 0. We controlled for repeated observations  
257 from the same individual across days by including bird identity as a random effect.

258         After running the initial model and assessing diagnostic plots, we detected one  
259 observation with a standardized residual that was > 3 standard deviations above 0 (all  
260 others < 2.8), which we considered an outlier. Exclusion of this point did not change our  
261 results, but improved model fit, and so was excluded from the analysis.

262

### 263 **Nestling morphology and fledging success**

264 We tested for differences in nestling growth rates between treatments using a three-  
265 parameter logistic growth curve, which has been shown to model tree swallow growth  
266 accurately (McCarty 2001; Zach and Mayoh 1982). Our sample size in 2017 and 2018  
267 was 19 ( $\text{Control}_{2017} = 12$ ,  $\text{Trimmed}_{2017} = 9$ ) and 37 ( $\text{Control}_{2018} = 18$ ,  $\text{Trimmed}_{2018} = 19$ )  
268 nests respectively. At each time point on the growth curve (i.e., 0, 3, 6, 9, 12d post-  
269 hatch), we calculated the average nestling mass, per brood, and used this as our  
270 dependent variable, because we did not track individual nestlings in 2017.

271         We constructed the growth curve model using the “nlme” function from the nlme  
272 package (version 3.1-137, Pinheiro et al., 2014). To describe the patterns of nestling  
273 growth, we calculated three parameters from the growth curve: the asymptotic mass ( $A$ )  
274 (i.e., peak mass, ~ day 12 post-hatch) (in grams), the inflection point (i.e., point of  
275 steepest growth) ( $I$ ) of the growth curve (in days), and the growth rate constant (i.e.,

276 steepness of growth curve) ( $K$ ). We estimated our parameter starting values using the  
277 “SSlogis” function from Stats package (base R).

278 We included ‘maternal identity’ as a random intercept on the asymptotic  
279 parameter to control for statistical non-independence in the growth rate among nestlings  
280 that were dammed from the same females. A random intercept for ‘maternal identity’ was  
281 initially applied to all growth rate parameters ( $A$ ,  $K$ ,  $I$ ), however, application of a random  
282 intercept to the asymptotic parameter alone explained the greater variance in our data (see  
283 supplementary material, Table S1, for more details). Confidence intervals and predictions  
284 were calculated using bootstrapping with replacement based on 1000 replications.

285 We tested for differences in day 12 nestling wing length between treatments using  
286 a linear mixed effects model (lme4). Our model included main effects of treatment, lay  
287 date (standardized), and year, and maternal identity was treated as a random effect to  
288 control for both statistical non-independence of returning mothers ( $n=6$ ) between years  
289 and nestlings within the same brood.

290 To determine whether treatment affected an individual nestling’s fledging  
291 success, which we defined as either 1 (fledged) or 0 (did not fledge), we used a  
292 generalized linear mixed model (glmer function in lme4) with a binomial error  
293 distribution and a logit link. We used the same model structure as we did for nestling  
294 morphology. After plotting the predictions from the model, we noticed differences in  
295 variance between treatments, and subsequently ran an F-test (using the var.test function  
296 in stats package, base R) on the predicted probabilities from the model. Results from the  
297 F-test confirmed violation of homogeneity of variance ( $F_{163,145} = 6.78$ , 95% CI [4.93,

298 9.31],  $P < 0.0001$ ) and we re-ran our model with the inclusion of a variance structure  
299 (using with the “weights” argument) to control for heteroskedasticity between treatments.

300

## 301 **Results**

### 302 **Feeding rate**

303 On average, maternal feeding rate (visits·hr<sup>-1</sup>) ( $\pm$  SE) did not differ between treatments ( $P$   
304 = 0.165; control birds:  $11.8 \pm 0.55$ , trimmed birds:  $11.4 \pm 0.53$ ). Feeding rate was  
305 negatively related to PC1 score ( $P < 0.0001$ , Fig. 1, Table 2), indicating that birds foraged  
306 less on wetter and more humid days. We did not detect an interaction between treatment  
307 and PC1 score ( $P = 0.122$ , Table 2), but there was a trend of higher feeding rates in  
308 control birds on wetter and more humid days relative to trimmed birds (Fig. 1). Feeding  
309 rate differed significantly between treatments as a function of PC2 score (i.e., treatment x  
310 PC2 score,  $P = 0.020$ , Fig. 2, Table 2). At the highest PC2 score (i.e., 1, indicating high  
311 temperature, low wind speed), trimmed birds made 5.5% more trips per hour (~8 extra  
312 visits, given a 16hr day) than controls. However, at the lowest PC2 score (i.e., 0, meaning  
313 low temperature, high wind speed), trimmed birds made 23% less trips per hour (~32  
314 visits, given a 16hr day) than control birds. Feeding rate increased with brood size ( $P =$   
315 0.045, Table 2); females raising larger broods (7 nestlings) made ~3 more visits to the  
316 nest per hour than mothers raising small broods (3 nestlings). Provisioning rate was also  
317 negatively related to lay date ( $P = 0.055$ , Table 2), meaning that earlier nesting birds had  
318 higher feeding rates than later nesting birds.

319

320

## 321 **Nestling morphology and fledging success**

322 The best model for describing nestling mass included a random intercept on asymptotic  
323 mass (supplementary material, Table S1). Nestlings from trimmed mothers were heavier  
324 ( $\pm$  SE) by  $1.71 \pm 0.48$ g at their asymptote ( $\sim$  day 12 post-hatch) compared with nestlings  
325 from control mothers at their asymptote (i.e., Treatment,  $P = 0.001$ , Fig. 3, Table 3). We  
326 did not detect any significant differences in the inflection point ( $\sim$  day 5 post-hatch)  
327 between groups ( $P = 0.061$ , Table 3), nor in the growth rate constant (i.e., steepness of  
328 curves) between groups ( $P = 0.548$ ). Wing length did not statistically differ between  
329 treatments ( $\beta = 0.18$ , 95% CI [-0.03, 0.38],  $P = 0.090$ ), although nestlings in 2017 had  
330 longer wings than nestlings in 2018 (i.e., Year,  $\beta = -0.38$ , 95% CI [-0.57, -0.20],  $P <$   
331  $0.001$ ). Lay date was negatively related to wing length ( $\beta = -0.03$ , 95% CI [-0.05, -0.01],  
332  $P = 0.006$ ).

333 The probability of fledging ( $\pm$  SE) was significantly higher for nestlings in  
334 trimmed ( $98.4 \pm 0.03\%$ ) compared to control broods ( $94.1 \pm 0.01\%$ ) (Odds Ratio = 3.93,  
335 95% CI [1.03, 14.96],  $P = 0.045$ , Fig. 4), and did not differ significantly between years  
336 (Odds Ratio = 2.62, 95% CI [0.77, 8.89],  $P = 0.122$ ). Similar to nestling morphology, lay  
337 date was negatively related to fledging success (Odds Ratio = 0.87, 95% CI [0.76, 1.00],  
338  $P = 0.054$ ).

339

## 340 **Discussion**

341 We found that the ability to dissipate body heat affected the reproductive performance of  
342 female tree swallows in a context-dependent manner, providing partial support for the  
343 HDL hypothesis. We had predicted that trimmed birds would maintain higher feeding

344 rates than control birds due to the increased capacity to dissipate body heat. Instead, an  
345 individual's feeding rate depended on the interactive effects of multiple environmental  
346 factors. When it was hot and wind speeds were low (high PC2 score), trimmed birds  
347 tended to provision their offspring more than control birds, but this pattern was reversed  
348 when it was cool and windy (low PC2 score) (Fig. 2).

349         The relatively higher activity rates of trimmed birds at high PC2 scores (hot and  
350 calm) compared with control birds is consistent with studies from the mammalian  
351 literature, in which experimental fur removal in mice allows for higher sustained energy  
352 expenditure during lactation, as measured via increases in food intake and milk  
353 production (Gamo et al. 2016; Król et al. 2007). It is also consistent with the idea that  
354 different mechanisms (e.g., heat dissipation vs. peripheral limitation) can constrain  
355 SusMR in different circumstances (Wen et al. 2017). For instance, lactating laboratory  
356 mice appear to face a heat dissipation limitation at warm (30 °C), but not room (i.e., 21  
357 °C), temperatures (Wen et al. 2017). Given that the relative effect of PC2 on feeding rate  
358 was much weaker at the high end of the scale (i.e., when warm and calm trimmed birds  
359 made 5% more trips than controls) versus the low end of the scale (i.e., when cool and  
360 windy trimmed birds made 23% fewer trips than controls), our study provides only partial  
361 support to the HDL hypothesis.

362         Wind speed can reduce foraging rates in tree swallows, and daily average wind  
363 speed can have a greater effect on feeding rate than average temperature, presumably  
364 because high winds make aerial insects more difficult to find and/or by increasing the  
365 flight costs during foraging (Rose 2009). If flight costs were increased in windy  
366 conditions, thereby increasing energy expenditure and  $T_b$  (Wolf et al. 2000), trimmed



367 birds would have an advantage because of increased heat dissipation capacity. However,  
368 this would only be advantageous if temperatures were also warm, as this would minimize  
369 heat gain from solar radiation (Wolf and Walsberg 1996). In the context of our study,  
370 temperature and wind were negatively related in PC2, so the birds were not experiencing  
371 warm and windy conditions, but rather were experiencing cool and windy conditions.  
372 Thus, it is likely that trimmed birds would have difficulty maintaining heat balance in  
373 cool air temperatures and high wind speeds, because heat loss to the environment would  
374 occur more quickly than any heat generated via metabolism (Zerba et al. 1999).

375         There was a significant decline in feeding rate with increasing PC1 score (relative  
376 humidity and precipitation). While we did not detect a statistically significant interactive  
377 effect of treatment and PC1 ( $P = 0.12$ ) on feeding rate, trimmed birds appeared to feed  
378 their nestlings less frequently at high PC1 scores (high precipitation, high relative  
379 humidity) than at low PC1 scores (low precipitation, low relative humidity) (Fig. 1).  
380 Precipitation has been found to negatively influence feeding rate in passerines (Öberg et  
381 al. 2014; Winkler et al. 2013), and it is generally assumed that the decline in foraging rate  
382 is caused by a reduction in insect activity (Cox et al. 2019; Irons et al. 2017; Winkler et  
383 al. 2013). If however precipitation did decrease tree swallow foraging rate due to lowered  
384 insect activity, this should have affected both treatments equally, but this tended not to be  
385 the case as Fig. 2 shows. Rain has a “cooling effect” on the subjective temperature an  
386 animal experiences, which would make thermoregulation more difficult for an animal  
387 with less insulation (i.e., a trimmed bird). Furthermore, precipitation is typically  
388 associated with cloud cover, which would limit thermal radiation reaching the birds.  
389 Therefore, precipitation may have influenced foraging rate because of the challenges of

390 thermoregulating under cool and wet conditions, rather than because of reduced insect  
391 activity.

392 Relative humidity can also influence activity level in birds (Gerson et al. 2014).

393 When  $T_a$  exceeds  $T_b$ , heat cannot be lost via dry heat transfer, and evaporative heat  
394 transfer is the only means to dissipate metabolic heat. While  $T_a$  never exceeded  $T_b$  in our  
395 study (max  $T_a=34^\circ\text{C}$ , mean  $T_b\sim 41^\circ\text{C}$ , S. Tapper, unpublished data), relative humidity  
396 still plays an important role in thermoregulation because it decreases the potential for  
397 evaporative heat loss (Gerson et al. 2014). In our study, as precipitation and relative  
398 humidity increased together in PC1, temperature simultaneously decreased in PC1. Birds  
399 in our study were therefore likely experiencing cool and wet conditions, rather than warm  
400 and wet conditions. If increased precipitation had a cooling effect on air temperature, then  
401 this would explain why trimmed birds had lower foraging rates than control birds at  
402 higher PC1 scores.

403 We predicted that due to increased activity rates, trimmed females would have  
404 heavier nestlings than controls. In line with this prediction, trimmed females had  
405 nestlings that reached higher asymptotic masses ( $\sim$  day 12 post-hatch, Fig. 4) compared  
406 with control females. However, the mechanism by which this prediction supports the  
407 HDL hypothesis is unlikely to be due to feeding rate alone, because trimmed birds had a  
408 relatively minor advantage in feeding rate at high PC1 (hot and non-windy) scores  
409 relative to their disadvantage at low PC1 scores (cool and windy). The heavier offspring  
410 of trimmed females may in part be due to trimmed females transferring more heat to their  
411 offspring during brooding compared with control mothers. Tree swallow nestlings do not  
412 develop feathers until around 6 to 7 days post-hatch (Marsh 1980), and mothers typically

413 continue brooding until swallows reach 5 days of age (McCarty 1996). Although we did  
414 not estimate heat transfer of the brood patch/trimmed area between treatments, in a study  
415 similar to ours, Nord and Nilsson (2018) trimmed ~22% of the total surface area of male  
416 and female blue tits resulting in an approximate 47% increase in estimated heat transfer  
417 for trimmed compared to control birds. However, Nord and Nilsson (2018) trimmed a  
418 greater proportion of the plumage than we did (22% in their study, 7% in ours), as we did  
419 not remove feathers covering the pectoral muscles. Nevertheless, it is plausible that a 7%  
420 difference in estimated heat transfer between treatments could lead to an advantage in  
421 terms of increased growth and survivorship (Dawson et al. 2005; Klaassen et al. 1994;  
422 Pérez et al. 2008). For instance, if nestlings were experiencing cool temperatures and  
423 responded by increasing metabolic rate (Nord and Nilsson 2011), then nestlings from  
424 trimmed broods receiving direct heat transfer from the enlarged bare skin surface could  
425 have had more energy to put into growth rather than maintaining homeothermy.

426 Nestlings from trimmed broods may also have been heavier than controls because  
427 of adults providing nestlings with different quantities, or quality of food (Sofaer et al.  
428 2018; Twining et al. 2016), or because male swallows adjusted their provisioning strategy  
429 in accordance with female behaviour, thus leading to differences in the total feeding  
430 frequency per nest (Akçay et al. 2016; Lendvai et al. 2018).

431 We predicted that in addition to producing heavier and structurally larger  
432 nestlings at day 12, nestling fledging success would be greater in trimmed compared to  
433 control broods. In line with this prediction, fledging success was higher for nestlings from  
434 trimmed broods ( $P = 0.045$ ) and was also less variable compared to control broods (Fig.  
435 4). This suggests lower overall mortality for nestlings in trimmed compared to control

436 broods. In birds, fledging success is typically correlated with post-fledging survival and  
437 recruitment (McCarty 1996; Weatherhead and Dufour 2000). While we do not have the  
438 data to examine post-fledging survival, it is possible that increased fledging success and  
439 less variance around fledging success for trimmed birds could also mean less variability  
440 in post-fledging survival, which would suggest a possible fitness benefit for trimmed  
441 birds.

442         In conclusion, our data demonstrate that heat dissipation capacity is an important  
443 factor influencing female tree swallow behaviour and breeding success. We provide  
444 evidence that even a small adjustment to the ventral plumage can cause birds to modulate  
445 their activity levels, as measured indirectly via provisioning rate. Therefore, this supports  
446 the HDL hypothesis's predictions that heat dissipation can alter SusMR in free-living  
447 animals.

448         As global temperatures and frequencies of heat waves increase (IPCC 2014), the  
449 physiological parameter of heat balance will be of higher concern for all birds,  
450 particularly aerial insectivores such as tree swallows. The birds in our study did not  
451 experience temperatures beyond their  $T_b$ , but we provide evidence that under such  
452 extreme conditions, being unable to effectively dissipate body heat could decrease  
453 reproductive success. Our study also highlights the likely reason why birds mostly keep  
454 their plumage during the breeding season: because cool, rainy, and windy weather can  
455 negatively affect foraging rate and potentially thermoregulation. In addition to warming  
456 temperatures, climate change may also reduce the food supply of tree swallows (Irons et  
457 al. 2017; Winkler et al. 2013). Tree swallows may then have to contend with both the  
458 effects of reduced food supply and overheating while feeding their young.

459

## 460 **Acknowledgements**

461 We thank A. Schubert and J. Baici for help with data collection, D. Marshall for help  
462 with antenna construction, E. Bridge for assistance with data loggers, A. Gerson for  
463 loaning RFID equipment, J. Robertson for advice on statistics, and S. Morin for helpful  
464 edits.

465

## 466 **Funding**

467 This research was supported by funds from the Natural Sciences and Engineering  
468 Research Council of Canada (NSERC) (RGPIN-04158-2014), and the Canadian  
469 Foundation for Innovation, the Ontario Innovation Trust (G.B.).

470

## 471 **References**

- 472 Akçay Ç, Lendvai ÁZ, Haussmann M, Moore IT, Bonier F (2016) Strategic adjustment  
473 of parental care in tree trade-offs and the role of glucocorticoids. *R Soc Open Sci* 3.  
474 doi: 10.1098/rsos.160740
- 475 Bates D, Maechler M, Bolker B, Walker S (2015) Fitting linear mixed-effects models  
476 using lme4. *J Stat Softw* 67:1–48
- 477 Baumgard LH, Rhoads RP (2013) Effects of heat stress on postabsorptive metabolism  
478 and energetics. *Annu Rev Anim Biosci* 1:311–337. doi: 10.1146/annurev-animal-  
479 031412-103644
- 480 Borrás A, Pascual J, Senar JC (2014) What do different bill measures measure and what  
481 is the best method to use in granivorous birds? *J F Ornithol* 71:606–611. doi:

- 482 10.1648/0273-8570-71.4.606
- 483 Boulant JA (1998) Hypothalamic neurons. Mechanisms of sensitivity to temperature.  
484 Ann N Y Acad Sci 856:108–15. doi: 9917871
- 485 Carroll JM, Davis CA, Elmore RD, Fuhlendorf SD, Thacker ET (2015) Thermal patterns  
486 constrain diurnal behavior of a ground-dwelling bird. Ecosphere 6:1–15. doi:  
487 10.1890/ES15-00163.1
- 488 Costantini D, Monaghan P, Metcalfe NB (2012) Early life experience primes resistance  
489 to oxidative stress. J Exp Biol 215:2820–2826. doi: 10.1242/jeb.072231
- 490 Cox A, Robertson R, Lendvai Á, Everitt K, Bonier F (2019) Rainy springs linked to poor  
491 nestling growth in a declining avian aerial insectivore (*Tachycineta bicolor*). Proc R  
492 Soc B Biol Sci 286. doi: 10.1098/rspb.2019.0018
- 493 Dawson RD, Lawrie CC, O’Brien EL (2005) The importance of microclimate variation in  
494 determining size, growth and survival of avian offspring: experimental evidence  
495 from a cavity nesting passerine. Oecologia 144:499–507. doi: 10.1007/s00442-005-  
496 0075-7
- 497 Drent RH, Daan S (2002) The prudent parent: energetic adjustments in avian breeding.  
498 Ardea 68:225–252. doi: 10.5253/arde.v68.p225
- 499 Gamo Y, Bernard A, Troup C, Munro F, Derrer K, Jeannesson N, Campbell A, Gray H,  
500 Miller J, Dixon J, Mitchell SE, Hambly C, et al (2016) Limits to sustained energy  
501 intake XXIV: Impact of suckling behaviour on the body temperatures of lactating  
502 female mice. Sci Rep 6:1–12. doi: 10.1038/srep25665
- 503 Gerson AR, Smith EK, Smit B, McKechnie AE, Wolf BO (2014) The impact of humidity  
504 on evaporative cooling in small desert birds exposed to high air temperatures.

- 505       Physiol Biochem Zool 87:782–795. doi: 10.1086/678956
- 506       Hammond KA, Konarzewski M, Torres RM, Diamond J (1994) Metabolic ceilings under  
507       a combination of peak energy demands. Physiol Zool 67:1479–1506
- 508       Hussell DJT (1983) Age and color in female tree swallows. J F Ornithol 54:312–318
- 509       IPCC (2014) Climate Change 2014 Synthesis Report
- 510       Irons RD, Scurr AH, Rose AP, Hagelin JC, Blake T, Doak DF (2017) Wind and rain are  
511       the primary climate factors driving changing phenology of an aerial insectivore.  
512       Proc R Soc B Biol Sci 284. doi: 10.1098/rspb.2017.0412
- 513       Johnson MS, Speakman JR (2001) Limits to sustained energy intake. V. Effect of cold-  
514       exposure during lactation in *Mus musculus*. J Exp Biol 204:1967–1977. doi:  
515       10.1016/j.cbpa.2009.04.281
- 516       Klaassen M, Habekotté B, Schinkelshoek P, Stienen E, Tienen PVT (1994) Influence of  
517       growth rate retardation on time budgets and energetics of *Arctic tern Sterna*  
518       *paradisaea* and common tern *S. hirundo chicks*. Ibis (Lond 1859) 136:197–204. doi:  
519       10.1111/j.1474-919X.1994.tb01085.x
- 520       Król E, Murphy M, Speakman JR (2007) Limits to sustained energy intake. X. Effects of  
521       fur removal on reproductive performance in laboratory mice. J Exp Biol 210:4233–  
522       4243. doi: 10.1242/jeb.009779
- 523       Książek A, Konarzewski M (2016) Heat dissipation does not suppress an immune  
524       response in laboratory mice divergently selected for basal metabolic rate (BMR). J  
525       Exp Biol 219:1542-1551. doi: 10.1242/jeb.129312
- 526       Kuznetsova A, Brockhoff PB, Christensen RHB (2017) lmerTest Package: tests in linear  
527       mixed effects models. J Stat Softw 82:1–26. doi: 10.18637/jss.v082.i13

- 528 LaZerte SE, Reudink MW, Otter KA, Kusack J, Bailey JM, Woolverton A, Paetkau M,  
529 de Jong A, Hill DJ (2017) feedr and animalnexus.ca: a paired R package and user-  
530 friendly Web application for transforming and visualizing animal movement data  
531 from static stations. *Ecol Evol* 7:7884–7896. doi: 10.1002/ece3.3240
- 532 Lease HM, Murray IW, Fuller A, Hetem RS (2014) Black wildebeest seek shade less and  
533 use solar orientation behavior more than do blue wildebeest. *J Therm Biol* 45:150–  
534 156. doi: 10.1016/j.jtherbio.2014.08.008
- 535 Lendvai ÁZ, Akçay Ç, Stanback M, Haussmann MF, Moore IT, Bonier F (2018) Male  
536 parental investment reflects the level of partner contributions and brood value in tree  
537 swallows. *Behav Ecol Sociobiol* 72. doi: 10.1007/s00265-018-2594-3
- 538 Lenth R (2019) emmeans: estimated marginal means, aka least-squares means
- 539 Luther D, Danner R (2016) Males with larger bills sing at higher rates in a hot and dry  
540 environment. *Auk* 133:770–778. doi: 10.1642/AUK-16-6.1
- 541 Marsh RL (1980) Development of temperature regulation in nestling tree swallows.  
542 *Condor Ornithol Appl* 82:461–463. doi: 10.2307/1367576
- 543 McCarty JP (2001) Variation in growth of nestling tree swallows across multiple  
544 temporal and spatial scales. *Auk* 118:176–190. doi: 10.2307/4089767
- 545 McCarty JP (1996) The energetic cost of begging in nestling passerines. *Auk* 113:178–  
546 188. doi: 10.2307/4088944
- 547 McKechnie AE, Wolf BO (2009) Climate change increases the likelihood of catastrophic  
548 avian mortality events during extreme heat waves. *Biol Lett* 6:253–256. doi:  
549 10.1098/rsbl.2009.0702
- 550 Monaghan P, Nager RG (1997) Why don't birds lay more eggs? *Trends Ecol Evol*



- 551 12:270–274
- 552 Nicolaus M, Bouwman KM, Dingemans NJ (2011) Effect of PIT tags on the survival  
553 and recruitment of great tits *Parus major*. *Ardea* 96:286–292. doi:  
554 10.5253/078.096.0215
- 555 Nilsson JÅ, Nord A (2018) Testing the heat dissipation limit theory in a breeding  
556 passerine. *Proc R Soc B Biol Sci* 285. doi: 10.1098/rspb.2018.0652
- 557 Nord A, Nilsson J-Å (2011) Incubation temperature affects growth and energy  
558 metabolism in blue tit nestlings. *Am Nat* 178:639–651. doi: 10.1086/662172
- 559 Nord A, Nilsson JÅ (2018) Heat dissipation rate constrains reproductive investment in a  
560 wild bird. *Funct Ecol* 33:250–259. doi: 10.1111/1365-2435.13243
- 561 Öberg M, Arlt D, Pärt T, Laugen AT, Eggers S, Low M (2014) Rainfall during parental  
562 care reduces reproductive and survival components of fitness in a passerine bird.  
563 *Ecol Evol* 5:345–356. doi: 10.1002/ece3.1345
- 564 Ohrnberger SA, Monclús R, Rödel HG, Valencak TG (2016) Ambient temperature  
565 affects postnatal litter size reduction in golden hamsters. *Front Zool* 13:1–10. doi:  
566 10.1186/s12983-016-0183-8
- 567 Ouyang JQ, Lendvai Z, Dakin R, Domalik AD, Fasanello VJ, Vassallo BG, Haussmann  
568 MF, Moore IT, Bonier F (2015) Weathering the storm: parental effort and  
569 experimental manipulation of stress hormones predict brood survival. *BMC Evol*  
570 *Biol* 15:1–8. doi: 10.1186/s12862-015-0497-8
- 571 Palermo-Neto J, Calefi AS, Aloia TP, Gomes AV, Pinheiro ML, Ribeiro A, Ferraz-de-  
572 Paula V, Astolfi-Ferreira CS, Ferreira AJ, Sharif S, Quinteiro-Filho WM (2013)  
573 Heat stress impairs performance parameters, immunity and increases *Salmonella*

574 *enteritidis* migration to spleen of broilers chickens. *Brain Behav Immun* 32. doi:  
575 10.1016/j.bbi.2013.07.075

576 Pérez JH, Ardia DR, Chad EK, Clotfelter ED (2008) Experimental heating reveals nest  
577 temperature affects nestling condition in tree swallows (*Tachycineta bicolor*). *Biol*  
578 *Lett* 4:468–471. doi: 10.1098/rsbl.2008.0266

579 Peterson CC, Nagy KA, Diamond J (1990) Sustained metabolic scope. *Proc Natl Acad*  
580 *Sci* 87:2324–2328

581 Pinheiro J, Bates D, Debroy S, Sarkar D, R Core Team (2014) nlme: Linear and  
582 Nonlinear Mixed Effects Models. R package version 3.1-117. *J Apic Res* 19:196–  
583 199

584 Rose AP (2009) Temporal and individual variation in offspring provisioning by tree  
585 swallows: A new method of automated nest attendance monitoring. *PLoS One* 4:.  
586 doi: 10.1371/journal.pone.0004111

587 Roti Roti JL (2008) Cellular responses to hyperthermia (40–46 ° C): cell killing and  
588 molecular events. *Int J Hyperth* 24:3–15. doi: 10.1080/02656730701769841

589 Sofaer HR, Sillett TS, Yoon J, Power ML, Morrison SA, Ghalambor CK (2018)  
590 Offspring growth and mobility in response to variation in parental care: a  
591 comparison between populations. *J Avian Biol* 49:.. doi: 10.1111/jav.01646

592 Speakman JR, Król E (2010) Maximal heat dissipation capacity and hyperthermia risk:  
593 neglected key factors in the ecology of endotherms. *J Anim Ecol* 79:726–746. doi:  
594 10.1111/j.1365-2656.2010.01689.x

595 Street GM, Rodgers AR, Fryxell JM (2015) Mid-day temperature variation influences  
596 seasonal habitat selection by moose. *J Wildl Manage* 79:505–512. doi:

- 597 10.1002/jwmg.859
- 598 Szafrńska PA, Zub K, Wieczorek M, Książek A, Speakman JR, Konarzewski M (2014)
- 599 Shaving increases daily energy expenditure in free-living root voles. *J Exp Biol*
- 600 217:3964–3967. doi: 10.1242/jeb.103754
- 601 Theuerkauf J, Jędrzejewski W, Schmidt K, Okarma H, Ruczyński I, Śnieżko S, Gula R
- 602 (2003) Daily patterns and duration of wolf activity in the Białowieża Forest, Poland.
- 603 *J Mammal* 84:243–253. doi: 10.1644/1545
- 604 1542(2003)084<0243:DPADOW>2.0.CO;2
- 605 Twining CW, Brenna JT, Lawrence P, Shipley JR, Tollefson TN, Winkler DW (2016)
- 606 Omega-3 long-chain polyunsaturated fatty acids support aerial insectivore
- 607 performance more than food quantity. *Proc Natl Acad Sci* 113:10920–10925. doi:
- 608 10.1073/pnas.1603998113
- 609 Valencak TG, Hackländer K, Ruf T (2011) Peak energy turnover in lactating European
- 610 hares : a test of the heat dissipation limitation hypothesis. *J Exp Biol* 213:2832–
- 611 2839. doi: 10.1242/jeb.040238.Peak
- 612 van Beest FM, Van Moorter B, Milner JM (2012) Temperature-mediated habitat use and
- 613 selection by a heat-sensitive northern ungulate. *Anim Behav* 84:723–735. doi:
- 614 10.1016/j.anbehav.2012.06.032
- 615 Weatherhead PJ, Dufour KW (2000) Fledging success as an index of recruitment in red-
- 616 winged blackbirds. *Auk* 117:627–633. doi: 10.2307/4089588
- 617 Wen J, Tan S, Qiao Q-G, Fan W-J, Huang Y-X, Cao J, Liu J-S, Wang Z-X, Zhao Z-J
- 618 (2017) Sustained energy intake in lactating Swiss mice: a dual modulation process. *J*
- 619 *Exp Biol* 220:2277–2286. doi: 10.1242/jeb.157107

- 620 Winkler DW, Luo MK, Rakhimberdiev E (2013) Temperature effects on food supply and  
621 chick mortality in tree swallows (*Tachycineta bicolor*). *Oecologia* 173:129–138. doi:  
622 10.1007/s00442-013-2605-z
- 623 Wolf BO, Walsberg G (1996) Thermal effects of radiation and wind on a small bird and  
624 implications for microsite selection. *Ecology* 77:2228–2236. doi: 10.2307/2265716
- 625 Wolf BO, Wooden KM, Walsberg GE (2000) Effects of complex radiative and  
626 convective environments on the thermal biology of the white-crowned sparrow  
627 (*Zonotrichia leucophrys gambelii*). *J Exp Biol* 203:803–811
- 628 Zach R, Mayoh KR (1982) Weight and feather growth of nestling tree swallows. *Can J*  
629 *Zool* 60:1080–1090. doi: 10.1139/z82-149
- 630 Zerba E, Dana AN, Lucia MA (1999) The influence of wind and locomotor activity on  
631 surface temperature and energy expenditure of the eastern house finch (*Carpodacus*  
632 *mexicanus*) during cold stress. *Physiol Biochem Zool* 72:265–276. doi:  
633 10.1086/316665
- 634 Zub K, Fletcher QE, Szafrńska PA, Konarzewski M (2013) Male weasels decrease  
635 activity and energy expenditure in response to high ambient temperatures. *PLoS One*  
636 8. doi: 10.1371/journal.pone.0072646
- 637

## Tables

**Table 1** Rotated matrix values of principal component analysis scores for 2017 and 2018 environmental data. To improve interpretation of results, we multiplied PC1 by -1 so that relative humidity and precipitation were positively related to PC1 score. The first two PCs explained a combined 69.1 % variance in the weather data (PC1 = 41.54 %, PC2 = 27.58 %).

| <b>Variable</b>   | <b>PC1</b> | <b>PC2</b> |
|-------------------|------------|------------|
| Temperature       | -0.36      | 0.56       |
| Wind speed        | 0.17       | -0.74      |
| Relative humidity | 0.67       | 0.21       |
| Precipitation     | 0.62       | 0.30       |

**Table 2** Factors contributing to variation in maternal feeding rate. Fixed effect coefficient estimates with 95% confidence intervals (CI), and *P*-values.

| <b>Predictor</b> | <b>Estimate</b> | <b>95% CI</b>        | <b><i>P</i>-value</b> |
|------------------|-----------------|----------------------|-----------------------|
| Intercept        | 10.13           | 5.87 – 14.39         | <0.001                |
| Treatment        | -1.30           | -3.13 – 0.53         | 0.165                 |
| PC1              | -5.48           | <b>-7.12 – -3.84</b> | <b>&lt;0.001</b>      |
| PC2              | 0.75            | -0.98 – 2.49         | 0.394                 |
| Year             | 0.01            | -0.97 – 0.99         | 0.977                 |
| Lay date         | -0.12           | -0.24 – 0.00         | 0.055                 |
| Brood size       | 0.74            | 0.03 – 1.45          | 0.045                 |
| Nestling age     | 0.01            | -0.06 – 0.07         | 0.856                 |
| Treatment x PC1  | -1.86           | -4.22 – 0.50         | 0.123                 |
| Treatment x PC2  | 2.84            | <b>0.46 – 5.22</b>   | <b>0.020</b>          |

**Table 3** Parameter estimates for nestling growth trajectories. Fixed effect coefficients with 95% confidence intervals (CI), and *P*-values.

| <b>Parameter</b>                     | <b>Predictors</b> | <b>Estimates</b> | <b>95% CI</b>      | <b><i>P</i>-value</b> |
|--------------------------------------|-------------------|------------------|--------------------|-----------------------|
| Asymptote<br>( <i>A</i> )            | Intercept         | 21.1             | 20.15 – 21.67      | <0.001                |
|                                      | Treatment         | 1.68             | <b>0.37 – 2.72</b> | <b>0.001</b>          |
| Inflection point<br>( <i>I</i> )     | Intercept         | 4.75             | 4.65 – 5.08        | <0.001                |
|                                      | Treatment         | 0.21             | -0.08 – 0.51       | 0.064                 |
| Growth rate constant<br>( <i>K</i> ) | Intercept         | 1.91             | 1.76 – 2.01        | <0.001                |
|                                      | Treatment         | 0.05             | -0.12 – 0.23       | 0.548                 |

## Figures

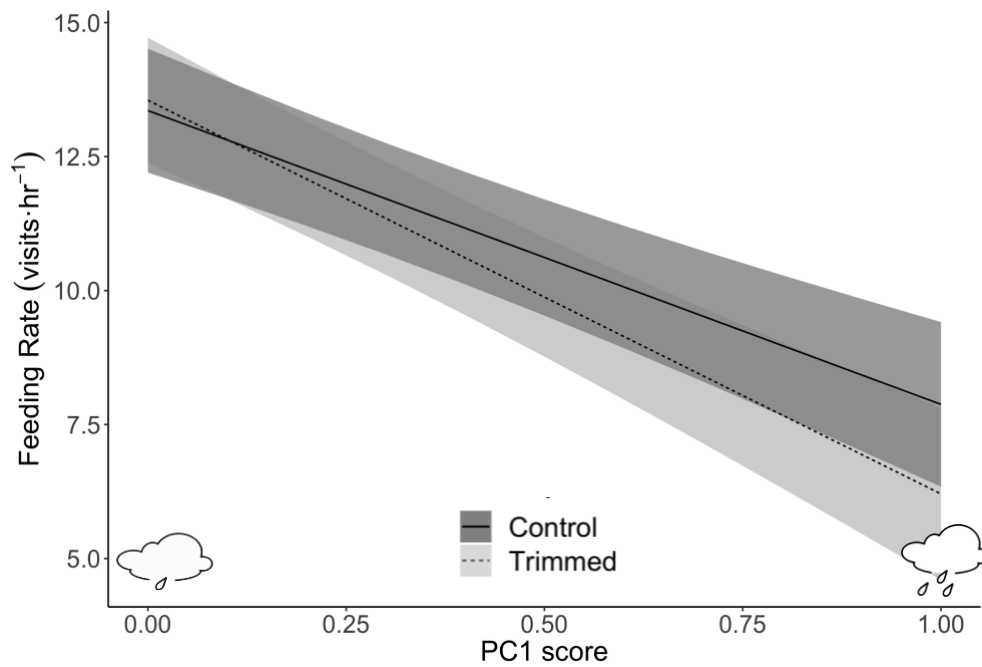

**Fig. 1** Prediction plot of female provisioning rate ( $\pm$  95% CI) in relation to PC1 score. All other predictors in the model are held at their constant value. Low PC1 scores represent low rainfall and low humidity conditions, while high PC1 scores represent high rainfall and high humidity conditions. As relative humidity and rainfall increased, females with an increased capacity to dissipate heat (i.e., trimmed) decreased feeding rates more sharply than control birds. Sample sizes ( $N_{\text{control}}=28$ ,  $N_{\text{trimmed}}=27$ ).



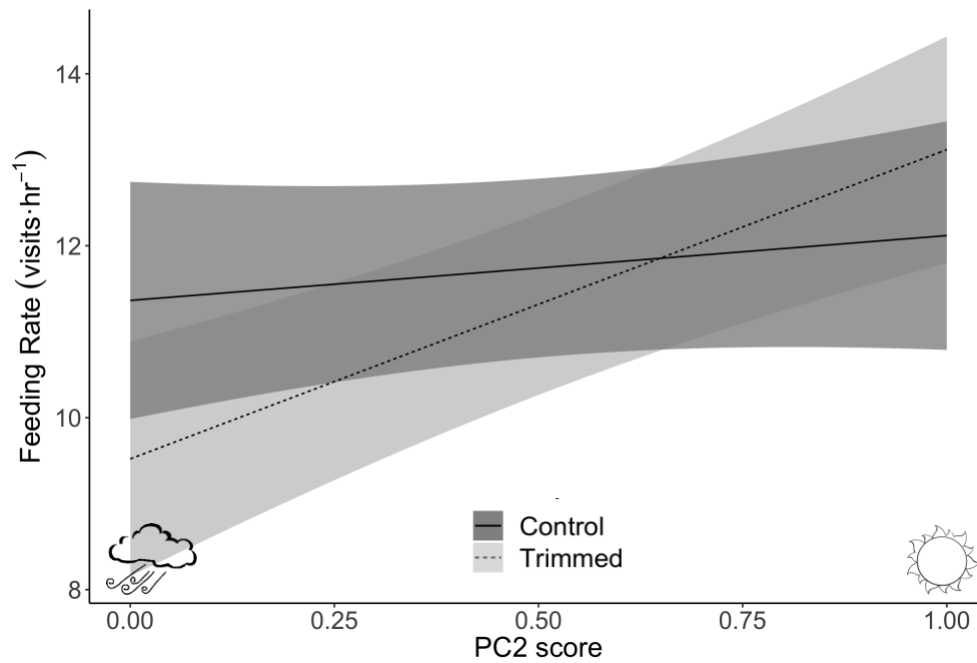

**Fig. 2** Prediction plot of female feeding rate ( $\pm$  95% CI) in relation to PC2 score. All other predictors in the model are held at their constant value. Low PC2 scores represent cool and windy conditions, while high PC2 scores represent hot and calm conditions. As temperature increased and wind speed decreased, females with an increased capacity to dissipate heat (i.e., trimmed) increased feeding rates, while control birds remained relatively constant across PC2 scores. Sample sizes ( $N_{\text{control}}=28$ ,  $N_{\text{trimmed}}=27$ ).

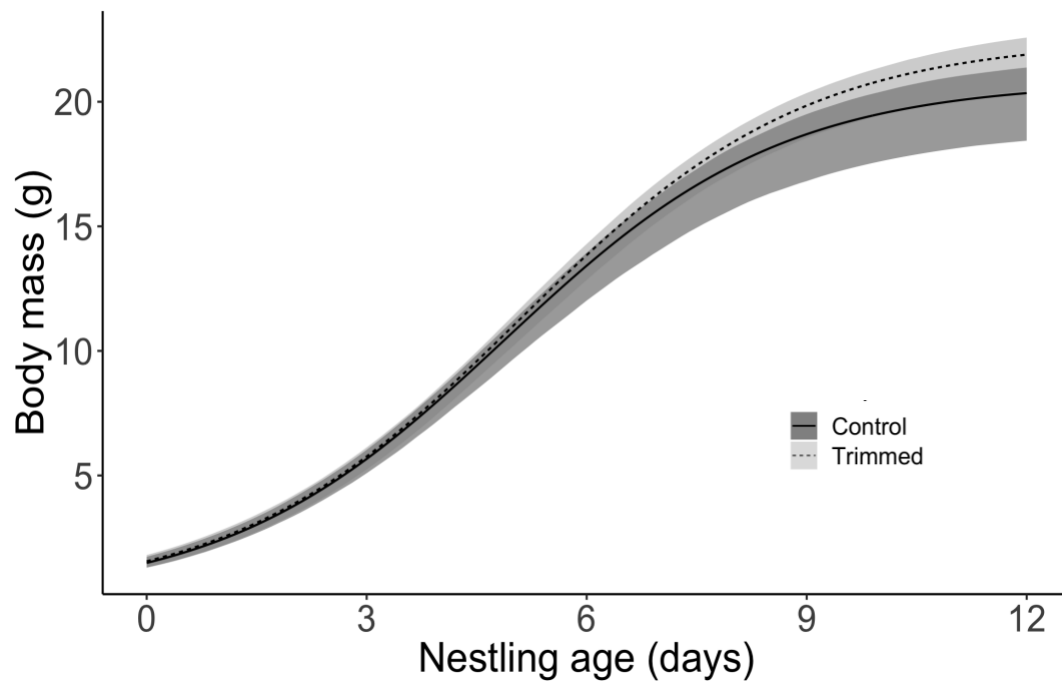

**Fig. 3** Estimated growth trajectories comparing the growth of nestlings from control broods and from those in which females had increased heat dissipation capacity (i.e., trimmed). Bands around lines represent the 95% confidence intervals obtained from bootstrapping. There were 309 nestlings from 58 nests ( $N_{\text{Control}}=30$ ,  $N_{\text{Trimmed}}=28$ ).

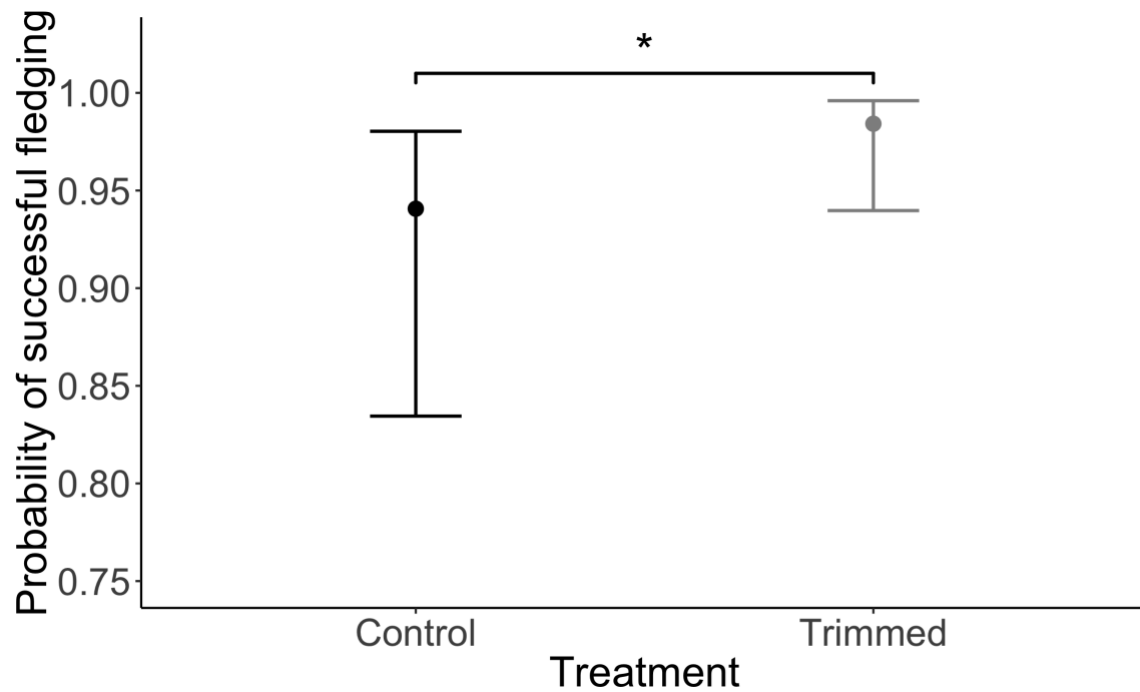

**Fig. 4** Predicted probability of nestling fledging success as a function of treatment ( $\pm$  95% confidence intervals), converted from odds ratios to probabilities. \*  $P < 0.05$ . There was a higher probability that nestlings from trimmed broods would fledge over nestlings from control broods. There were 309 nestlings from 58 nests ( $N_{\text{Control}}=30$ ,  $N_{\text{Trimmed}}=28$ )
